# Supplementary material for: Phage gene expression and host responses lead to infection-dependent costs of CRISPR immunity
Source: PubMed Central journal article supplement (PMC8027618; doi:10.1038/s41396-020-00794-w), 2020-10-03
Supplement: 41396_2020_794_MOESM2_ESM.pdf [file 41396_2020_794_MOESM2_ESM.pdf]

| ID        | log2FoldChange | padj        | gene | time | Uniprot | Notes                                               | Class      | pa14_locus_tag |
|-----------|----------------|-------------|------|------|---------|-----------------------------------------------------|------------|----------------|
| BPAMKIAM_ | -1.020613641   | 8.61E-19    | NA   | 60   | NA      | NA                                                  | NA         | PA14_00080     |
| BPAMKIAM_ | -1.004907666   | 5.53E-19    | NA   | 120  | NA      | NA                                                  | NA         | PA14_00080     |
| BPAMKIAM_ | -1.350052836   | 0.005076332 | cheB | 120  | Q9I6V9  | chemotaxis signal transduction pathway              | motility   | PA14_02180     |
| BPAMKIAM_ | -1.175495368   | 0.000423359 | cheD | 120  | NA      | chemotaxis signal transduction pathway              | motility   | PA14_02190     |
| BPAMKIAM_ | -1.295630899   | 2.10E-19    | cheR | 120  | P07801  | chemotaxis protein methyltransferase                | motility   | PA14_02200     |
| BPAMKIAM_ | -1.195188553   | 3.77E-27    | NA   | 120  | NA      | NA                                                  | NA         | PA14_02220     |
| BPAMKIAM_ | -1.382317743   | 6.91E-20    | cheW | 120  | P0A964  | chemotaxis                                          | motility   | PA14_02230     |
| BPAMKIAM_ | -1.484476962   | 4.25E-26    | NA   | 120  | NA      | NA                                                  | NA         | PA14_02250     |
| BPAMKIAM_ | -1.108727148   | 4.49E-24    | NA   | 60   | NA      | NA                                                  | NA         | PA14_02250     |
| BPAMKIAM_ | -1.089001479   | 9.87E-26    | cheY | 120  | P0AE67  | chemotaxis protein; sensory regulation of flagellum | motility   | PA14_02260     |
| BPAMKIAM_ | -1.287054304   | 9.87E-26    | NA   | 120  | NA      | NA                                                  | NA         | PA14_02270     |
| BPAMKIAM_ | -1.247839255   | 1.56E-06    | NA   | 60   | NA      | NA                                                  | NA         | PA14_02270     |
| BPAMKIAM_ | -1.323468868   | 0.000232877 | pntA | 120  | P07001  | NADPH regeneration; proton transmembrane transport  | transport  | PA14_02460     |
| BPAMKIAM_ | -1.132404706   | 0.000986538 | pntA | 60   | P07001  | NADPH regeneration; proton transmembrane transport  | transport  | PA14_02460     |
| BPAMKIAM_ | 1.463302059    | 3.34E-18    | cysA | 120  | P16676  | sulfate transport                                   | transport  | PA14_03650     |
| BPAMKIAM_ | 1.274837984    | 5.90E-08    | cysA | 60   | P16676  | sulfate transport                                   | transport  | PA14_03650     |
| BPAMKIAM_ | 1.30541315     | 7.21E-06    | cysW | 120  | P0AEB0  | sulfate transport                                   | transport  | PA14_03670     |
| BPAMKIAM_ | 1.152831095    | 2.13E-05    | ygiW | 120  | P0ADU5  | biofilm formation; ceullar response                 | signalling | PA14_04180     |
| BPAMKIAM_ | 1.39824038     | 5.67E-08    | ygiW | 60   | P0ADU5  | biofilm formation; ceullar response                 | signalling | PA14_04180     |
| BPAMKIAM_ | -1.291015796   | 6.88E-07    | dht  | 60   | Q9I676  | dihydropyriminase                                   | metabolism | PA14_05770     |
| BPAMKIAM_ | -1.170191366   | 2.50E-05    | dht  | 120  | Q9I676  | dihydropyriminase                                   | metabolism | PA14_05770     |
| BPAMKIAM_ | 2.034594708    | 5.30E-38    | yfdE | 120  | P76518  | acetyl coenzyme A                                   | metabolism | PA14_05820     |
| BPAMKIAM_ | 1.589101759    | 2.01E-29    | mmgC | 60   | P45857  | acyl-coA dehydrogenase; sporulation                 | metabolism | PA14_05840     |
| BPAMKIAM_ | 3.129428403    | 1.70E-161   | mmgC | 120  | P45857  | acyl-coA dehydrogenase; sporulation                 | metabolism | PA14_05840     |
| BPAMKIAM_ | 1.261713032    | 0.000986538 | norB | 60   | Q59647  | nitric oxide reducatse                              | metabolism | PA14_06830     |
| BPAMKIAM_ | 1.326300564    | 0.001665032 | NA   | 60   | NA      | NA                                                  | NA         | PA14_06840     |
| BPAMKIAM_ | 1.101798382    | 0.000104258 | NA   | 60   | NA      | NA                                                  | NA         | PA14_06860     |
| BPAMKIAM_ | 1.251241295    | 4.84E-08    | NA   | 120  | NA      | NA                                                  | NA         | PA14_06860     |
| BPAMKIAM_ | 1.822416308    | 0.000892989 | NA   | 120  | NA      | NA                                                  | NA         | PA14_06940     |
| BPAMKIAM_ | 3.583346214    | 1.11E-166   | puuB | 120  | P37906  | putrescine breakdown                                | metabolism | PA14_06960     |
| BPAMKIAM_ | 3.068314182    | 8.47E-27    | puuB | 35   | P37906  | putrescine breakdown                                | metabolism | PA14_06960     |
| BPAMKIAM_ | 4.430895213    | 1.27E-82    | puuB | 60   | P37906  | putrescine breakdown                                | metabolism | PA14_06960     |
| BPAMKIAM_ | 3.484844334    | 2.72E-32    | NA   | 60   | NA      | NA                                                  | NA         | PA14_06970     |
| BPAMKIAM_ | 1.66046939     | 2.44E-05    | NA   | 35   | NA      | NA                                                  | NA         | PA14_06970     |
| BPAMKIAM_ | 3.624704908    | 3.69E-86    | NA   | 120  | NA      | NA                                                  | NA         | PA14_06970     |
| BPAMKIAM_ | -3.127269925   | 3.83E-85    | paiB | 120  | P21341  | protease synthase; sporulation                      | metabolism | PA14_09790     |
| BPAMKIAM_ | -4.667730889   | 8.48E-09    | NA   | 120  | NA      | NA                                                  | NA         | PA14_09810     |
| BPAMKIAM_ | 1.064248358    | 2.81E-05    | NA   | 120  | NA      | NA                                                  | NA         | PA14_11790     |
| BPAMKIAM_ | 1.127374744    | 6.66E-20    | ald  | 60   | Q9FDS1  | nicotine catabolism                                 | metabolism | NA             |
| BPAMKIAM_ | 1.198568914    | 2.10E-19    | ald  | 120  | Q9FDS1  | nicotine catabolism                                 | metabolism | NA             |
| BPAMKIAM_ | 1.136604033    | 7.46E-14    | ald  | 35   | Q9FDS1  | nicotine catabolism                                 | metabolism | NA             |
| BPAMKIAM_ | 1.94263108     | 5.46E-05    | NA   | 120  | NA      | NA                                                  | NA         | PA14_40820     |
| BPAMKIAM_ | 1.75938133     | 0.000182681 | moaB | 60   | P0AEZ9  | molybdopterin biosynthesis                          | metabolism | PA14_13260     |
| BPAMKIAM_ | 1.51738951     | 0.011160926 | moaB | 35   | P0AEZ9  | molybdopterin biosynthesis                          | metabolism | PA14_13260     |
| BPAMKIAM_ | 1.8664432      | 0.006555852 | NA   | 120  | NA      | NA                                                  | NA         | NA             |
| BPAMKIAM_ | 2.413147737    | 0.000391149 | NA   | 35   | NA      | NA                                                  | NA         | NA             |
| BPAMKIAM_ | 2.373435002    | 2.04E-06    | NA   | 60   | NA      | NA                                                  | NA         | NA             |

|           |              |             |      |     |        |                                                              |            |            |
|-----------|--------------|-------------|------|-----|--------|--------------------------------------------------------------|------------|------------|
| BPAMKIAM_ | 2.296220886  | 9.34E-06    | narK | 60  | P10903 | nitrate transporter                                          | metabolism | PA14_13770 |
| BPAMKIAM_ | 1.976165361  | 2.30E-06    | narK | 120 | P10903 | nitrate transporter                                          | metabolism | PA14_13770 |
| BPAMKIAM_ | 2.16366339   | 1.25E-06    | narK | 35  | P10903 | nitrate transporter                                          | metabolism | PA14_13770 |
| BPAMKIAM_ | 1.556581059  | 7.47E-05    | narG | 120 | P09152 | nitrate metabolism                                           | metabolism | PA14_13780 |
| BPAMKIAM_ | 2.396664768  | 1.93E-08    | narG | 60  | P09152 | nitrate metabolism                                           | metabolism | PA14_13780 |
| BPAMKIAM_ | 2.091021915  | 3.31E-06    | narG | 35  | P09152 | nitrate metabolism                                           | metabolism | PA14_13780 |
| BPAMKIAM_ | 1.471038285  | 0.000602092 | narY | 60  | P19318 | nitrate reductase                                            | metabolism | PA14_13800 |
| BPAMKIAM_ | 1.505981983  | 9.91E-07    | narY | 120 | P19318 | nitrate reductase                                            | metabolism | PA14_13800 |
| BPAMKIAM_ | 2.070110242  | 1.61E-08    | narV | 120 | P0AF32 | nitrate reductase                                            | metabolism | PA14_13830 |
| BPAMKIAM_ | 1.556588698  | 0.006072436 | narV | 60  | P0AF32 | nitrate reductase                                            | metabolism | PA14_13830 |
| BPAMKIAM_ | 2.184216909  | 0.010191371 | surA | 60  | NA     | outermembrane assembly; required for pilus formation         | transport  | PA14_13840 |
| BPAMKIAM_ | 2.063479155  | 1.26E-05    | surA | 120 | NA     | outermembrane assembly; required for pilus formation         | transport  | PA14_13840 |
| BPAMKIAM_ | 1.689073226  | 0.000334861 | moaA | 120 | Q44118 | molybdopterin biosynthesis                                   | metabolism | PA14_13850 |
| BPAMKIAM_ | -1.43161934  | 3.31E-06    | NA   | 35  | NA     | NA                                                           | NA         | PA14_14420 |
| BPAMKIAM_ | -1.652940974 | 1.66E-14    | NA   | 60  | NA     | NA                                                           | NA         | PA14_14420 |
| BPAMKIAM_ | -1.057180464 | 1.63E-06    | NA   | 120 | NA     | NA                                                           | NA         | PA14_14420 |
| BPAMKIAM_ | -1.027239824 | 5.48E-21    | NA   | 35  | NA     | NA                                                           | NA         | PA14_16020 |
| BPAMKIAM_ | -1.03309146  | 0.000780744 | NA   | 120 | NA     | NA                                                           | NA         | PA14_16100 |
| BPAMKIAM_ | 1.109640768  | 0.003683592 | yaeQ | 120 | NA     | unknown                                                      | NA         | PA14_16210 |
| BPAMKIAM_ | 1.382636808  | 1.22E-10    | yodB | 120 | P76345 | transcriptional regulator; degradation of aromatic compounds | metabolism | PA14_18060 |
| BPAMKIAM_ | 1.431345134  | 6.81E-08    | NA   | 120 | NA     | NA                                                           | NA         | PA14_18680 |
| BPAMKIAM_ | -1.054461308 | 0.038791867 | NA   | 120 | NA     | NA                                                           | NA         | PA14_18820 |
| BPAMKIAM_ | 1.581227634  | 8.25E-13    | NA   | 60  | NA     | NA                                                           | NA         | PA14_20460 |
| BPAMKIAM_ | 1.064680167  | 1.51E-08    | NA   | 120 | NA     | NA                                                           | NA         | PA14_20460 |
| BPAMKIAM_ | 1.46767688   | 1.43E-06    | NA   | 35  | NA     | NA                                                           | NA         | PA14_20460 |
| BPAMKIAM_ | 1.618412106  | 1.84E-10    | NA   | 60  | NA     | NA                                                           | NA         | PA14_20470 |
| BPAMKIAM_ | 1.503655555  | 6.44E-10    | NA   | 35  | NA     | NA                                                           | NA         | PA14_20470 |
| BPAMKIAM_ | 1.459067278  | 1.45E-10    | NA   | 35  | NA     | NA                                                           | NA         | PA14_20480 |
| BPAMKIAM_ | 1.040518713  | 7.80E-06    | NA   | 60  | NA     | NA                                                           | NA         | PA14_20480 |
| BPAMKIAM_ | 1.622110375  | 1.15E-10    | NA   | 35  | NA     | NA                                                           | NA         | PA14_20740 |
| BPAMKIAM_ | 1.335817868  | 3.15E-13    | fecA | 120 | P13036 | siderophore uptake; signalling receptor                      | signalling | NA         |
| BPAMKIAM_ | 1.226020664  | 5.30E-05    | NA   | 120 | NA     | NA                                                           | NA         | NA         |
| BPAMKIAM_ | -1.167187208 | 0.005575216 | NA   | 120 | NA     | NA                                                           | NA         | PA14_21920 |
| BPAMKIAM_ | -1.531956708 | 3.43E-12    | yjch | 120 | P0AF54 | membrane protein                                             | transport  | PA14_22340 |
| BPAMKIAM_ | -1.699905004 | 4.22E-06    | yjch | 60  | P0AF54 | membrane protein                                             | transport  | PA14_22340 |
| BPAMKIAM_ | 1.077137174  | 0.000584158 | NA   | 120 | NA     | NA                                                           | NA         | PA14_22720 |
| BPAMKIAM_ | 1.331790303  | 0.000267114 | sasA | 60  | NA     | adaptive response; signal transduction                       | signalling | PA14_22730 |
| BPAMKIAM_ | 1.815233833  | 2.41E-09    | sasA | 120 | NA     | adaptive response; signal transduction                       | signalling | PA14_22730 |
| BPAMKIAM_ | 2.006893878  | 1.07E-19    | NA   | 120 | NA     | NA                                                           | NA         | PA14_22740 |
| BPAMKIAM_ | 1.6618377    | 5.03E-11    | NA   | 60  | NA     | NA                                                           | NA         | PA14_22740 |
| BPAMKIAM_ | 1.186951658  | 0.00896385  | NA   | 35  | NA     | NA                                                           | NA         | PA14_22740 |
| BPAMKIAM_ | 1.459508248  | 0.000786816 | pgl  | 120 | P74618 | glucose metabolism                                           | metabolism | PA14_23080 |
| BPAMKIAM_ | 1.251608477  | 0.010054773 | NA   | 120 | NA     | NA                                                           | NA         | NA         |
| BPAMKIAM_ | 1.197355066  | 3.26E-05    | NA   | 35  | NA     | NA                                                           | NA         | PA14_25820 |
| BPAMKIAM_ | 1.326409984  | 0.006388049 | NA   | 35  | NA     | NA                                                           | NA         | PA14_25830 |
| BPAMKIAM_ | 1.460821148  | 0.000460888 | NA   | 60  | NA     | NA                                                           | NA         | PA14_25830 |
| BPAMKIAM_ | 1.603434499  | 0.014984759 | NA   | 35  | NA     | NA                                                           | NA         | NA         |
| BPAMKIAM_ | 1.020078382  | 0.033864537 | NA   | 120 | NA     | NA                                                           | NA         | NA         |

|           |              |             |      |     |        |                                                                            |                    |            |
|-----------|--------------|-------------|------|-----|--------|----------------------------------------------------------------------------|--------------------|------------|
| BPAMKIAM_ | 1.325898714  | 3.29E-20    | NA   | 35  | NA     | NA                                                                         | NA                 | PA14_28600 |
| BPAMKIAM_ | -1.041190412 | 1.02E-12    | NA   | 120 | NA     | NA                                                                         | NA                 | PA14_29330 |
| BPAMKIAM_ | 1.096828632  | 0.012490521 | pfeS | 120 | Q04804 | sensor protein                                                             | signalling         | PA14_29360 |
| BPAMKIAM_ | -1.197541843 | 7.97E-15    | lecA | 120 | Q05097 | carbohydrate binding; cell-cell adhesion                                   | metabolism         | PA14_31290 |
| BPAMKIAM_ | -1.139862981 | 0.00154533  | lecA | 60  | Q05097 | carbohydrate binding; cell-cell adhesion                                   | metabolism         | PA14_31290 |
| BPAMKIAM_ | -1.023371774 | 2.01E-14    | sqr  | 60  | O67931 | quinone binding; nucleotide binding                                        | nucleotide_binding | PA14_31350 |
| BPAMKIAM_ | -1.24472775  | 8.17E-24    | sqr  | 120 | O67931 | quinone binding; nucleotide binding                                        | nucleotide_binding | PA14_31350 |
| BPAMKIAM_ | -1.044011371 | 3.69E-07    | NA   | 60  | NA     | NA                                                                         | NA                 | PA14_31450 |
| BPAMKIAM_ | -1.070742159 | 4.76E-07    | acsA | 60  | P39062 | acetyl coenzyme A                                                          | metabolism         | PA14_31500 |
| BPAMKIAM_ | 1.310641316  | 3.43E-11    | mdtA | 120 | P76397 | transmembrane transport; xenobiotic efflux                                 | transport          | PA14_31870 |
| BPAMKIAM_ | 1.158471934  | 2.42E-18    | mdtB | 120 | B7M458 | transmembrane transport; xenobiotic efflux                                 | transport          | NA         |
| BPAMKIAM_ | 1.168281676  | 1.95E-16    | mdtC | 120 | B7L9U9 | transmembrane transport; xenobiotic efflux                                 | transport          | NA         |
| BPAMKIAM_ | 1.631197663  | 2.49E-07    | ttgF | 120 | Q9KWV3 | efflux pump                                                                | transport          | PA14_31920 |
| BPAMKIAM_ | 1.022887055  | 0.028040091 | fhuA | 120 | P06971 | ferrichrome outer membrane transporter; phage receptor; siderophore uptake | signalling         | NA         |
| BPAMKIAM_ | -1.064248073 | 6.82E-05    | NA   | 120 | NA     | NA                                                                         | NA                 | PA14_34050 |
| BPAMKIAM_ | -1.294262111 | 1.31E-10    | NA   | 120 | NA     | NA                                                                         | NA                 | PA14_34070 |
| BPAMKIAM_ | 1.13692632   | 0.003700916 | NA   | 120 | NA     | NA                                                                         | NA                 | PA14_34490 |
| BPAMKIAM_ | 1.445918653  | 9.43E-08    | cmpB | 120 | Q55106 | transmembrane transport; SAPI excision                                     | transport          | PA14_34520 |
| BPAMKIAM_ | 1.137867644  | 0.00091736  | NA   | 60  | NA     | NA                                                                         | NA                 | PA14_53150 |
| BPAMKIAM_ | 1.293022843  | 0.000725663 | NA   | 120 | NA     | NA                                                                         | NA                 | PA14_35570 |
| BPAMKIAM_ | 1.204710599  | 3.69E-07    | mltF | 60  | NA     | membrane bound murein; flagella construction                               | motility           | PA14_36200 |
| BPAMKIAM_ | 1.707569624  | 2.52E-14    | mltF | 120 | NA     | membrane bound murein; flagella construction                               | motility           | PA14_36200 |
| BPAMKIAM_ | -1.020822807 | 9.59E-11    | NA   | 120 | NA     | NA                                                                         | NA                 | PA14_36470 |
| BPAMKIAM_ | 1.1583614    | 5.18E-09    | NA   | 35  | NA     | NA                                                                         | NA                 | PA14_36560 |
| BPAMKIAM_ | 1.311388046  | 0.00078505  | ligD | 120 | Q9I1X7 | NHEJ protein                                                               | nucleotide_binding | PA14_36910 |
| BPAMKIAM_ | 1.058363511  | 6.96E-08    | NA   | 120 | NA     | NA                                                                         | NA                 | PA14_39090 |
| BPAMKIAM_ | 1.124419469  | 1.59E-11    | NA   | 60  | NA     | NA                                                                         | NA                 | PA14_39090 |
| BPAMKIAM_ | -1.067595193 | 3.83E-09    | NA   | 120 | NA     | NA                                                                         | NA                 | PA14_39270 |
| BPAMKIAM_ | 1.101983038  | 3.21E-05    | metE | 120 | P25665 | methyl group transfer                                                      | metabolism         | PA14_39590 |
| BPAMKIAM_ | 1.191478537  | 0.038992177 | aroH | 120 | P80574 | aromatic amino acid biosynthesis                                           | metabolism         | NA         |
| BPAMKIAM_ | -1.187850062 | 7.96E-07    | NA   | 120 | NA     | NA                                                                         | NA                 | PA14_40100 |
| BPAMKIAM_ | 1.355412025  | 0.007673684 | rutR | 120 | P0ACU2 | transcriptional regulator; represses degradation of pyrimide and purine    | metabolism         | PA14_40380 |
| BPAMKIAM_ | 1.098442641  | 0.039598909 | rftN | 120 | A6X7E7 | riboflavin transmembrane transport                                         | transport          | PA14_40620 |
| BPAMKIAM_ | 1.083175103  | 0.006871102 | NA   | 120 | NA     | NA                                                                         | NA                 | PA14_40780 |
| BPAMKIAM_ | 1.50704939   | 0.005297368 | yfcA | 120 | P0AD30 | membrane transport                                                         | transport          | PA14_40940 |
| BPAMKIAM_ | 1.156998741  | 4.86E-32    | NA   | 120 | NA     | NA                                                                         | NA                 | PA14_43550 |
| BPAMKIAM_ | -1.031199915 | 1.95E-37    | ccoN | 120 | D9IA43 | cytochrome c oxidase                                                       | metabolism         | NA         |
| BPAMKIAM_ | -1.455329918 | 1.61E-08    | NA   | 120 | NA     | NA                                                                         | NA                 | PA14_44390 |
| BPAMKIAM_ | -1.087262834 | 1.60E-22    | ccoP | 120 | D9IA45 | cytochrome c oxidase                                                       | metabolism         | PA14_44360 |
| BPAMKIAM_ | 4.872301493  | 4.40E-78    | mdtJ | 120 | P69212 | spermidine export protein                                                  | transport          | PA14_44520 |
| BPAMKIAM_ | 2.688084983  | 3.28E-16    | mdtJ | 60  | P69212 | spermidine export protein                                                  | transport          | PA14_44520 |
| BPAMKIAM_ | 1.334359438  | 0.000134353 | mdtJ | 35  | P69212 | spermidine export protein                                                  | transport          | PA14_44520 |
| BPAMKIAM_ | 4.87649411   | 3.53E-28    | mdtI | 120 | P69210 | spermidine export protein                                                  | transport          | PA14_44530 |
| BPAMKIAM_ | -1.063814363 | 0.00190587  | fabR | 60  | NA     | repressor of fabA and fabB                                                 | metabolism         | PA14_44540 |
| BPAMKIAM_ | -1.168947815 | 1.65E-07    | fabR | 120 | NA     | repressor of fabA and fabB                                                 | metabolism         | PA14_44540 |
| BPAMKIAM_ | -2.129942302 | 0.000134353 | NA   | 35  | Q9I3H5 | oxidoreductase                                                             | metabolism         | PA14_44560 |
| BPAMKIAM_ | -1.727341696 | 0.000431222 | NA   | 60  | Q9I3H5 | oxidoreductase                                                             | metabolism         | PA14_44560 |
| BPAMKIAM_ | -1.342358185 | 1.06E-08    | uacT | 120 | Q46821 | uric acid transport                                                        | transport          | PA14_44950 |

|           |              |             |      |     |        |                                                                         |                        |            |
|-----------|--------------|-------------|------|-----|--------|-------------------------------------------------------------------------|------------------------|------------|
| BPAMKIAM_ | 1.746864017  | 0.00063265  | NA   | 120 | NA     | NA                                                                      | NA                     | PA14_45470 |
| BPAMKIAM_ | 1.094533451  | 6.31E-24    | ylxH | 35  | NA     | flagellum site determinant                                              | motility               | PA14_45640 |
| BPAMKIAM_ | 1.59304542   | 3.26E-25    | flhF | 35  | NA     | flagellar biosynthesis                                                  | motility               | PA14_45660 |
| BPAMKIAM_ | 1.142924667  | 1.07E-14    | flhF | 60  | NA     | flagellar biosynthesis                                                  | motility               | PA14_45660 |
| BPAMKIAM_ | 1.857222847  | 2.46E-43    | flhA | 35  | NA     | flagellar rod protein                                                   | motility               | PA14_45680 |
| BPAMKIAM_ | 1.334324242  | 1.09E-28    | flhA | 60  | NA     | flagellar rod protein                                                   | motility               | PA14_45680 |
| BPAMKIAM_ | 1.086301458  | 1.23E-09    | fliN | 35  | NA     | flagellar moto switch                                                   | motility               | PA14_45790 |
| BPAMKIAM_ | 1.174923142  | 3.28E-34    | NA   | 120 | NA     | NA                                                                      | NA                     | PA14_45830 |
| BPAMKIAM_ | 1.314504563  | 1.49E-27    | NA   | 60  | NA     | NA                                                                      | NA                     | PA14_45830 |
| BPAMKIAM_ | -1.069510947 | 0.01140196  | NA   | 60  | NA     | NA                                                                      | NA                     | PA14_46540 |
| BPAMKIAM_ | -1.04260299  | 6.96E-08    | NA   | 120 | NA     | NA                                                                      | NA                     | PA14_46540 |
| BPAMKIAM_ | -1.033737539 | 0.039163764 | NA   | 60  | NA     | NA                                                                      | NA                     | PA14_46550 |
| BPAMKIAM_ | -1.028619612 | 1.36E-07    | NA   | 120 | NA     | NA                                                                      | NA                     | PA14_46550 |
| BPAMKIAM_ | -1.141910502 | 6.30E-05    | napB | 120 | NA     | nitrate metabolism                                                      | metabolism             | PA14_49260 |
| BPAMKIAM_ | -1.128860657 | 3.22E-16    | napC | 120 | NA     | nitrate metabolism                                                      | metabolism             | PA14_49270 |
| BPAMKIAM_ | 1.691820512  | 2.17E-13    | fliJ | 35  | NA     | flagellar protein chemotaxis                                            | motility               | PA14_50080 |
| BPAMKIAM_ | 1.366872188  | 2.72E-07    | fliJ | 60  | NA     | flagellar protein chemotaxis                                            | motility               | PA14_50080 |
| BPAMKIAM_ | 1.328154333  | 4.76E-07    | fliI | 60  | NA     | flagellar protein                                                       | motility               | PA14_50100 |
| BPAMKIAM_ | 1.461162189  | 2.36E-08    | fliI | 35  | NA     | flagellar protein                                                       | motility               | PA14_50100 |
| BPAMKIAM_ | 1.17153518   | 4.58E-06    | NA   | 35  | NA     | NA                                                                      | NA                     | PA14_50110 |
| BPAMKIAM_ | 1.397326769  | 5.00E-37    | fliG | 35  | NA     | flagellar motor switch                                                  | motility               | PA14_50130 |
| BPAMKIAM_ | 1.690740752  | 2.13E-48    | NA   | 35  | NA     | NA                                                                      | NA                     | PA14_50140 |
| BPAMKIAM_ | 1.12702555   | 1.24E-23    | NA   | 60  | NA     | NA                                                                      | NA                     | PA14_50140 |
| BPAMKIAM_ | 1.072981562  | 5.02E-05    | fliE | 35  | NA     | flagellar hook associated                                               | motility               | PA14_50160 |
| BPAMKIAM_ | 1.804241108  | 3.05E-24    | atoC | 60  | NA     | response to spermidine motility chemotaxis and flagellum regulation     | motility               | PA14_50180 |
| BPAMKIAM_ | 2.182598141  | 1.93E-17    | atoC | 35  | NA     | response to spermidine motility chemotaxis and flagellum regulation     | motility               | PA14_50180 |
| BPAMKIAM_ | 1.016185503  | 2.85E-24    | NA   | 60  | NA     | NA                                                                      | NA                     | PA14_50340 |
| BPAMKIAM_ | 1.262878895  | 4.09E-27    | NA   | 60  | NA     | NA                                                                      | NA                     | PA14_50360 |
| BPAMKIAM_ | 1.043370799  | 5.51E-25    | NA   | 35  | NA     | NA                                                                      | NA                     | PA14_50360 |
| BPAMKIAM_ | 1.281123889  | 5.71E-11    | NA   | 35  | NA     | NA                                                                      | NA                     | PA14_50380 |
| BPAMKIAM_ | 1.405569625  | 7.89E-18    | NA   | 60  | NA     | NA                                                                      | NA                     | PA14_50380 |
| BPAMKIAM_ | 1.065002375  | 1.49E-10    | flgI | 120 | NA     | flagellar rod protein                                                   | motility               | PA14_50410 |
| BPAMKIAM_ | 1.204051232  | 5.72E-05    | flgI | 35  | NA     | flagellar rod protein                                                   | motility               | PA14_50410 |
| BPAMKIAM_ | 1.503268278  | 2.08E-12    | flgI | 60  | NA     | flagellar rod protein                                                   | motility               | PA14_50410 |
| BPAMKIAM_ | 1.676232555  | 2.08E-12    | flgH | 60  | NA     | flagellar rod protein                                                   | motility               | PA14_50420 |
| BPAMKIAM_ | 1.577401053  | 1.98E-10    | flgH | 35  | NA     | flagellar rod protein                                                   | motility               | PA14_50420 |
| BPAMKIAM_ | 1.269951549  | 6.01E-10    | flgG | 35  | NA     | flagellar rod protein                                                   | motility               | PA14_50430 |
| BPAMKIAM_ | 1.423850357  | 1.46E-15    | flgG | 60  | NA     | flagellar rod protein                                                   | motility               | PA14_50430 |
| BPAMKIAM_ | 1.498064847  | 2.80E-26    | flgF | 60  | NA     | flagellar rod protein                                                   | motility               | PA14_50440 |
| BPAMKIAM_ | 1.280184239  | 1.22E-21    | flgF | 120 | NA     | flagellar rod protein                                                   | motility               | PA14_50440 |
| BPAMKIAM_ | 1.240885682  | 2.37E-27    | flgE | 60  | NA     | flagellar hook associated                                               | motility               | PA14_50450 |
| BPAMKIAM_ | 1.395180803  | 2.45E-16    | flgD | 60  | NA     | flagellar rod protein                                                   | motility               | PA14_50460 |
| BPAMKIAM_ | 1.031690981  | 0.002344433 | flgC | 60  | NA     | flagellar rod protein                                                   | motility               | PA14_50470 |
| BPAMKIAM_ | 1.353172571  | 1.21E-12    | flgB | 60  | NA     | flagellar rod protein                                                   | motility               | PA14_50480 |
| BPAMKIAM_ | 1.086537276  | 0.000211569 | baeR | 120 | P69229 | transcriptional regulator; responds to membrane stress; links to CRISPR | transcriptional_regula | PA14_52250 |
| BPAMKIAM_ | 1.282146537  | 0.000462698 | baeR | 60  | P69229 | transcriptional regulator; responds to membrane stress; links to CRISPR | transcriptional_regula | PA14_52250 |
| BPAMKIAM_ | -1.080980824 | 0.002940596 | NA   | 120 | P32382 | NADH oxidase                                                            | metabolism             | PA14_53400 |
| BPAMKIAM_ | -1.110443863 | 0.036822144 | NA   | 60  | NA     | NA                                                                      | NA                     | PA14_28680 |

|           |              |             |       |     |        |                                              |            |            |
|-----------|--------------|-------------|-------|-----|--------|----------------------------------------------|------------|------------|
| BPAMKIAM_ | -1.060375447 | 4.37E-06    | NA    | 60  | NA     | NA                                           | NA         | PA14_55750 |
| BPAMKIAM_ | -1.123868098 | 2.38E-07    | NA    | 120 | NA     | NA                                           | NA         | PA14_55750 |
| BPAMKIAM_ | -1.1016342   | 3.76E-05    | NA    | 35  | NA     | NA                                           | NA         | PA14_55750 |
| BPAMKIAM_ | -1.105292811 | 2.32E-08    | NA    | 120 | NA     | NA                                           | NA         | PA14_55790 |
| BPAMKIAM_ | -1.046628384 | 7.52E-12    | NA    | 120 | NA     | NA                                           | NA         | PA14_55940 |
| BPAMKIAM_ | -6.086510847 | 3.42E-20    | NA    | 120 | NA     | NA                                           | NA         | PA14_56750 |
| BPAMKIAM_ | -5.574445463 | 7.70E-19    | argO  | 120 | NA     | arginine export                              | transport  | PA14_56770 |
| BPAMKIAM_ | 1.102864217  | 5.13E-05    | NA    | 60  | NA     | NA                                           | NA         | PA14_56830 |
| BPAMKIAM_ | 1.199956023  | 8.48E-09    | NA    | 120 | NA     | NA                                           | NA         | PA14_56830 |
| BPAMKIAM_ | 1.279287927  | 5.23E-05    | NA    | 120 | NA     | NA                                           | NA         | PA14_56840 |
| BPAMKIAM_ | 1.109353032  | 0.003669209 | NA    | 60  | NA     | NA                                           | NA         | PA14_56840 |
| BPAMKIAM_ | 1.148770548  | 6.76E-06    | NA    | 120 | NA     | NA                                           | NA         | PA14_56850 |
| BPAMKIAM_ | -1.093148534 | 0.01615761  | NA    | 35  | NA     | NA                                           | NA         | PA14_57640 |
| BPAMKIAM_ | -1.181562117 | 2.59E-06    | NA    | 60  | NA     | NA                                           | NA         | PA14_57640 |
| BPAMKIAM_ | 1.303923547  | 5.67E-31    | cysNC | 120 | NA     | sulfate transport                            | transport  | PA14_57710 |
| BPAMKIAM_ | 1.345191748  | 8.43E-08    | NA    | 60  | NA     | NA                                           | NA         | PA14_58560 |
| BPAMKIAM_ | 1.444799439  | 6.71E-14    | NA    | 120 | NA     | NA                                           | NA         | PA14_58560 |
| BPAMKIAM_ | 1.128692086  | 0.002795044 | NA    | 120 | NA     | NA                                           | NA         | PA14_58580 |
| BPAMKIAM_ | 1.368636291  | 0.019314339 | esiB  | 120 | NA     | immunoglobulin binding protein; inhibits ROS | metabolism | PA14_58600 |
| BPAMKIAM_ | -1.164357601 | 0.009899312 | NA    | 60  | NA     | NA                                           | NA         | PA14_59630 |
| BPAMKIAM_ | -1.177290379 | 2.97E-14    | NA    | 120 | NA     | NA                                           | NA         | PA14_61380 |
| BPAMKIAM_ | 1.035314352  | 0.044226138 | NA    | 120 | NA     | NA                                           | NA         | PA14_63880 |
| BPAMKIAM_ | -1.467974094 | 2.31E-05    | NA    | 120 | NA     | NA                                           | NA         | PA14_65840 |
| BPAMKIAM_ | 1.123506304  | 0.031702472 | NA    | 120 | NA     | NA                                           | NA         | PA14_65940 |
| BPAMKIAM_ | 2.039194822  | 9.91E-51    | ynfM  | 120 | P43531 | transmembrane protein                        | transport  | PA14_66510 |
| BPAMKIAM_ | 1.021919301  | 5.78E-07    | NA    | 35  | NA     | NA                                           | NA         | PA14_67440 |
| BPAMKIAM_ | 1.084988561  | 0.00137536  | NA    | 120 | NA     | NA                                           | NA         | PA14_68440 |
| BPAMKIAM_ | 1.000979304  | 0.001794574 | NA    | 60  | NA     | NA                                           | NA         | PA14_68890 |
| BPAMKIAM_ | 1.126540701  | 2.32E-19    | NA    | 120 | NA     | NA                                           | NA         | PA14_68900 |
| BPAMKIAM_ | 1.397794222  | 1.59E-11    | NA    | 60  | NA     | NA                                           | NA         | PA14_68900 |
| BPAMKIAM_ | 1.172371885  | 6.96E-07    | aspA  | 60  | P0AC38 | aspartate ammonia-lyase                      | metabolism | PA14_71650 |
| BPAMKIAM_ | 1.454660705  | 1.98E-18    | aspA  | 120 | P0AC38 | aspartate ammonia-lyase                      | metabolism | PA14_71650 |
| BPAMKIAM_ | -1.046449467 | 2.41E-05    | NA    | 120 | NA     | NA                                           | NA         | PA14_72060 |
| BPAMKIAM_ | 1.423668598  | 3.31E-06    | ivy   | 35  | Q9HXB1 | inhibitor of vertebrate lysozyme             | stress     | PA14_72360 |
| BPAMKIAM_ | 1.413515077  | 6.27E-16    | ivy   | 60  | Q9HXB1 | inhibitor of vertebrate lysozyme             | stress     | PA14_72360 |
| BPAMKIAM_ | 1.318105322  | 0.000360099 | NA    | 35  | NA     | NA                                           | NA         | PA14_72370 |
| BPAMKIAM_ | 1.551554114  | 2.62E-05    | kgtP  | 120 | P0AEX3 | cation symporter; membrane transport         | transport  | PA14_72960 |
| BPAMKIAM_ | 1.657123321  | 5.50E-05    | kgtP  | 60  | P0AEX3 | cation symporter; membrane transport         | transport  | PA14_72960 |
